# Supplementary material
Source: publisher figshare collection journal article supplement (https://gsapubs.figshare.com/ndownloader/files/23347289)
Supplement: Supplementary file 1 [file 23347289]

## Sheet: Sheet1
IGSN	Sample+Fraction	Zircon 206Pb/238U Age	±2σ		Y	±2σ	Zr	±2σ	Nb	±2σ	La	±2σ	Ce	±2σ	Pr	±2σ	Nd	±2σ	Sm	±2σ	Eu	±2σ	Gd	±2σ	Tb	±2σ	Dy	±2σ	Ho	±2σ	Er	±2σ	Tm	±2σ	Yb	±2σ	Lu	±2σ	Hf	±2σ	Ta	±2σ		Chondrite-normalized TEA data	La	Ce	Pr	Nd	Sm
IE3330006	TC-DPI-060713-2A z1_CBK				3342.83	489.39	484667	2811.07	6.60299	0.0118854	1.68643	0.291752	30.3851	2.66174	1.50355	0.224029	16.8551	0.407894	25.8868	0.962988	1.55046	0.238771	103.771	3.1754	27.2675	1.60333	266.95	29.3111	84.1552	7.60763	347.205	42.0812	62.8701	6.81512	515.022	57.3735	99.2253	11.9467	8044.95	135.155	0.90722	0.0446352		TC-DPI-060713-2A z1_CBK	7.11573	49.5679	16.1672	36.8821	174.911
IE3330006	TC-DPI-060713-2A z2_BS	32.404	0.0437152		1775.99	23.443	484305	10170.4	2.47102	0.203612	5.1606	0.208488	49.4149	1.48245	2.01034	0.314418	10.0658	0.839485	7.25257	0.194369	0.919884	0.104315	31.2796	1.4764	9.19694	0.428577	104.046	4.09941	38.0137	2.5089	180.195	1.80195	37.259	1.12522	338.323	11.909	71.3244	3.92284	10678.3	288.315	1.02009	0.0226461		TC-DPI-060713-2A z2_BS	21.7747	80.6117	21.6166	22.0257	49.0039
IE3330006	TC-DPI-060713-2A z2_CBK				2980.21	36.9546	484872	7467.02	18.0191	0.266682	1.86345	0.0737926	65.9374	0.553874	2.48917	0.552098	27.6963	2.3985	34.6033	0.6367	4.22919	0.797626	101.49	0.0608942	24.5711	2.56031	227.074	9.53709	69.2957	3.04901	289.155	9.07948	51.6298	1.43531	419.319	5.28342	80.929	2.46024	8375.78	340.057	0.886296	0.0397061		TC-DPI-060713-2A z2_CBK	7.86266	107.565	26.7653	60.6047	233.806
IE3330006	TC-DPI-060713-2A z3_BS	27.1052	0.0280285		4379.26	216.335	481927	25156.6	8.3949	0.480188	82.732	7.1315	272.031	25.3533	26.9488	1.64927	120.624	9.38456	44.2093	1.78606	1.81678	0.600265	123.932	9.0718	30.3658	2.32602	301.787	24.5655	98.7192	8.1542	428.192	16.9564	79.8843	6.43867	662.912	45.2106	129.468	8.20825	8927.78	482.1	2.24639	0.11816		TC-DPI-060713-2A z3_BS	349.08	443.77	289.772	263.948	298.712
IE3330006	TC-DPI-060713-2A z3_CBK				3877.84	194.668	483650	12671.6	37.3946	0.112184	30.6469	1.52621	92.5409	1.72126	9.30436	0.651305	53.1646	7.8152	36.8558	5.11559	5.55441	0.133306	127.788	13.8011	31.2001	0.124801	288.742	0.866227	90.0819	3.71138	375.696	24.1197	67.0434	1.82358	531.133	29.3185	104.89	3.73409	8236.05	303.087	0.538806	0.125865		TC-DPI-060713-2A z3_CBK	129.312	150.964	100.047	116.334	249.026
IE3330006	TC-DPI-060713-2A z4_BS	27.0847	0.0221522		4314.7	33.6546	480538	6247	17.0403	0.391927	0.021357	0.0113064	62.4675	0.612181	0.602267	0.335101	7.10333	0.829669	16.057	1.22355	0.624478	0.607867	78.1162	7.21793	25.3003	0.394685	286.812	13.1934	99.9447	0.779569	452.136	5.69691	86.5906	1.03909	694.512	9.72317	130.9	0.183261	10834.6	294.702	4.78567	0.049771		TC-DPI-060713-2A z4_BS	0.0901139	101.905	6.47599	15.5434	108.493
IE3330006	TC-DPI-060713-2A z4_CBK	27.1584	0.0277681		3122.41	192.34	483402	21946.4	10.0562	0.116652	0.646272	0.038647	35.48	2.54746	0.835812	0.017552	10.7791	1.26762	18.8612	0.486618	0.821693	0.112572	78.4593	2.52639	21.7643	1.31021	222.635	12.6457	72.7869	4.19253	320.695	13.7899	59.5449	2.09598	492.31	21.957	95.2889	4.6501	9680.83	621.509	2.10577	0.0543287		TC-DPI-060713-2A z4_CBK	2.72688	57.8793	8.98722	23.5866	127.44
IE3330006	TC-DPI-060713-2A z5_BS	31.0345	0.0344173		1671.77	57.5089	483025	8597.84	3.23958	0.0181416	2.28793	0.0846533	74.2016	4.34821	0.886447	0.0508821	4.73845	2.14841	5.92286	0.04146	1.98336	0.382789	27.5459	1.22304	7.89219	0.0552453	95.1256	1.16053	35.1368	0.484888	174.731	2.13172	39.8381	1.37043	381.801	12.8285	90.2121	0.162382	12004.1	201.669	0.98054	0.0729522		TC-DPI-060713-2A z5_BS	9.6537	121.047	9.53169	10.3686	40.0193
IE3330006	TC-DPI-060713-2A z5_CBK				1972.41	155.82	486615	7980.49	4.94845	0.118763	1.07652	0.0348792	17.299	1.73682	0.568626	0.0929135	6.44376	0.274504	13.027	0.125059	1.49264	0.266288	54.1369	5.61941	14.2787	1.84767	142.902	6.80215	46.4591	3.21497	198.821	12.7643	36.7565	3.24927	307.921	25.5574	63.1909	5.93994	8148.86	296.618	0.549939	0.0331063		TC-DPI-060713-2A z5_CBK	4.54227	28.2203	6.11426	14.1001	88.0203
IE3330006	TC-DPI-060713-2A z6_CBK	27.1293	0.0741905		3053.6	133.748	482717	16991.6	14.8399	0.48675	0.344346	0.0182503	50.0756	1.24187	0.24058	0.0449884	5.10571	0.0449302	12.5835	0.812894	0.532051	0.16185	61.2909	5.88393	17.8743	0.597001	203.733	5.2563	69.8659	3.68892	313.109	0.751462	59.9486	1.81045	502.462	12.4611	96.3521	2.02339	10467	16.7472	2.56574	0.103656		TC-DPI-060713-2A z6_CBK	1.45294	81.6894	2.58688	11.1722	85.0236
IE3330006	TC-DPI-060713-2A z7_CBK	27.1315	0.0516023		2530.41	315.795	483969	57205.2	11.0373	0.81676	1.16477	0.0990052	25.341	1.39882	0.50843	0.0719937	4.12317	0.489008	8.57491	0.197223	0.468284	0.00749254	46.166	3.09312	15.6216	0.424908	177.912	7.08091	60.3513	0.953551	278.627	9.97483	53.5421	2.61285	454.916	16.8319	87.164	3.92238	9920.9	873.039	2.60026	0.186178		TC-DPI-060713-2A z7_CBK	4.91463	41.3392	5.46699	9.02226	57.9386
IE3330006	TC-DPI-060713-2A z8_CBK				2188.33	34.5756	485694	18553.5	4.61614	0.160642	0.152866	0.00797959	20.3118	0.194994	0.801952	0.0485983	11.1138	0.79797	18.3717	0.947979	2.6638	0.157697	68.4642	0.890035	18.191	0.28378	174.619	6.42599	53.7738	1.59171	226.192	0.723814	41.6449	0.366475	343.934	8.52956	66.5705	0.173083	8712.56	128.946	0.628072	0.0616766		TC-DPI-060713-2A z8_CBK	0.645003	33.1351	8.62314	24.319	124.133
IE3330006	TC-DPI-060713-2A z9_CBK	27.1287	0.118232		3000.46	181.228	484417	27321.1	8.40603	0.206788	2.34903	0.103827	57.709	5.42464	1.62035	0.0534714	18.4098	1.97722	24.6185	0.502218	1.18603	0.21562	89.4495	2.34358	22.5291	0.396512	222.658	6.54616	70.3964	2.7877	295.321	4.54795	54.2267	0.661566	446.473	16.1623	86.7745	2.79414	8826.65	247.146	1.22531	0.0637159		TC-DPI-060713-2A z9_CBK	9.91151	94.1419	17.4231	40.2841	166.341
IE3330006	TC-DPI-060713-2A z10_CBK				4066	98.3972	482490	11483.3	13.7352	0.0824113	3.14263	0.354488	112.202	5.96917	1.94197	0.0248573	21.9593	2.49018	31.1507	2.13694	0.997748	0.166225	121.363	4.49042	31.9192	2.39394	309.389	17.6352	99.2332	3.11592	410.747	13.0618	76.1812	3.16914	627.656	22.3446	120.689	1.06207	9107.39	295.079	2.04263	0.0620959		TC-DPI-060713-2A z10_CBK	0.0109815	0.333756	0.0102321	0.145708	0.165191
IE3330006	TC-DPI-060713-2A z11a_CBK				6168.8	76.4932	477927	20550.9	120.986	0.725919	18.2258	1.6549	207.695	3.48927	2.00039	0.996193	21.8808	0.420111	37.958	4.59292	8.372	1.36129	155.536	7.59018	44.4654	5.94058	417.649	10.4412	147.732	1.06367	635.321	63.1509	119.776	2.01224	1009.96	104.43	211.621	0.846485	10390.9	263.928	2.16091	0.408413		TC-DPI-060713-2A z11a_CBK	0.0636875	0.617806	0.0105399	0.145187	0.20129
IE3330006	TC-DPI-060713-2A z11b_CBK				3015.62	54.8842	483147	7826.98	34.8491	0.599405	1.53579	0.206717	145.609	6.90187	bdl	bdl	6.6298	0.647068	17.3993	1.53114	3.87739	0.618831	75.6233	0.771358	20.1422	0.487441	204.468	6.87014	68.6206	2.93696	303.081	9.45613	59.21	2.19077	486.462	19.4585	97.7437	0.606011	9958.34	39.8334	1.62111	0.0314495		TC-DPI-060713-2A z11b_CBK	0.0053666	0.433127	#VALUE!	0.0439912	0.0922676
IE3330006	TC-DPI-060713-2A z11c_CBK				3127.29	26.8947	482253	6269.29	177.788	0.675596	6.63213	1.06512	95.1884	0.32364	bdl	bdl	bdl	bdl	19.9329	4.69221	5.49937	4.45449	72.6428	0.711899	21.3397	0.943216	184.859	4.43662	66.7232	13.9852	293.787	31.6702	62.247	8.44069	510.327	53.7884	118.337	9.15927	10630.4	59.53	2.61266	0.0600911		TC-DPI-060713-2A z11c_CBK	0.0231751	0.283146	#VALUE!	#VALUE!	0.105703
IE3330006	TC-DPI-060713-2A z12_CBK	27.1352	0.0262776		4055.41	41.3652	480984	2212.53	16.9804	0.132447	3.35177	0.218536	52.1459	2.98274	2.00795	0.0373479	13.9647	1.49981	18.9009	2.77843	0.567534	0.186264	82.7881	2.1856	24.6817	0.582488	267.587	0.0535175	91.3262	0.310509	402.58	4.91148	74.993	1.33487	616.196	6.40844	118.675	0.688317	10819.7	73.5743	3.98087	0.214967		TC-DPI-060713-2A z12_CBK	0.0117123	0.155112	0.0105797	0.0926612	0.100231
IE3330006	TC-DPI-060713-2A z13_CBK				4766.43	37.1781	478757	14937.2	30.6361	0.324742	3.58358	0.409962	170.722	0.580456	0.864341	0.288863	12.1502	4.02899	23.8037	0.399902	7.59522	0.202033	114.653	1.1236	30.0516	2.38009	306.064	10.7123	104.423	1.44104	470.668	25.7926	93.6973	4.29133	828.162	39.9174	176.674	0.565357	11748.9	364.216	1.21282	0.195022		TC-DPI-060713-2A z13_CBK	0.0125224	0.507829	0.00455415	0.0806209	0.12623
IE3330006	TC-DPI-060713-2A z14_CBK				3825.33	225.695	483834	20514.6	8.8074	0.118019	2.87471	0.229977	68.2691	8.08307	3.32251	0.307	35.4912	3.96082	40.8136	0.171417	1.58028	0.0423516	131.92	3.16607	31.4587	1.41564	300.722	9.32237	91.7417	0.293573	378.954	4.69903	69.1244	2.35023	557.564	10.8167	110.343	0.485507	8153.38	79.9032	1.21259	0.104768		TC-DPI-060713-2A z14_CBK	0.0100453	0.203073	0.0175061	0.235498	0.216433
IE3330008	TC-DPI-060813-4 z1_BS	27.1552	0.0409219		2668.72	74.1905	482849	675.989	9.83914	0.578541	0.391543	0.006343	51.872	3.42355	0.475714	0.054612	4.33467	0.213266	9.50649	0.0665454	0.377291	0.0707043	48.1351	2.35862	15.0677	0.774479	168.024	1.98268	59.666	2.18377	268.955	12.856	52.1659	0.845087	432.529	11.9378	86.3315	3.21153	10920.1	91.7289	2.75909	0.0474563		TC-DPI-060813-4 z1_BS	1.65208	84.6198	5.11521	9.48506	64.233
IE3330008	TC-DPI-060813-4 z1_CBK				1997.52	7.19109	483475	11893.5	11.5931	0.106656	0.169695	0.0106229	30.3144	1.72186	0.142792	0.0128513	3.73226	0.812139	9.0849	0.537826	1.22098	0.443459	38.6388	1.44509	11.8818	0.8341	130.463	2.42662	44.9537	2.01393	207.063	5.05234	41.6539	0.391547	358.736	8.17917	71.1178	0.455154	11213	168.195	0.967469	0.00677228		TC-DPI-060813-4 z1_CBK	0.716013	49.4525	1.5354	8.16687	61.3844
IE3330008	TC-DPI-060813-4 z2_BS	27.1245	0.0259854		2673.54	64.165	484649	4652.63	4.56419	0.0638986	0.736877	0.0282961	67.56	1.85115	1.13473	0.0830623	12.9145	0.0413263	18.183	0.556398	1.24109	0.131059	70.5484	2.41276	18.8434	0.101754	189.273	9.72862	63.6703	3.4764	272.592	7.90516	51.7798	2.6097	442.122	24.2283	87.4594	2.06404	9020.76	418.563	1.46744	0.0818831		TC-DPI-060813-4 z2_BS	3.10919	110.212	12.2014	28.2592	122.858
IE3330008	TC-DPI-060813-4 z2_CBK	27.2821	0.108064		2134.06	80.2408	486647	11582.2	10.3356	0.163303	2.25832	0.0555546	30.5184	1.22684	1.23753	0.113606	12.6675	0.314154	18.0519	1.17337	1.72559	0.490068	66.4483	2.41872	16.6943	0.450745	162.403	1.36418	51.0772	0.0817235	216.872	1.56148	39.4825	0.74227	329.881	4.35443	66.5559	1.3045	7839.12	3.13565	0.714694	0.0400229		TC-DPI-060813-4 z2_CBK	9.52876	49.7853	13.3068	27.7189	121.972
IE3330008	TC-DPI-060813-4 z3_BS	32.7364	0.0308413		1579.81	40.443	483195	2126.06	2.92436	0.00467897	0.0258976	0.00805933	28.7269	1.19504	0.206663	0.0605522	2.2057	0.491429	4.4707	0.675076	0.952513	0.196599	23.1892	1.81803	7.63875	0.172636	88.0601	2.46568	33.8564	0.0541703	166.696	0.100017	36.203	0.738541	343.165	14.3443	80.6218	1.62856	12052.6	151.863	1.35911	0.0399577		TC-DPI-060813-4 z3_BS	0.109273	46.8628	2.22218	4.82647	30.2074
IE3330008	TC-DPI-060813-4 z3_CBK				5291.59	110.065	479005	958.01	56.6111	0.226444	9.90175	0.0950568	99.8137	0.239553	6.89864	0.139353	30.0978	6.8322	21.044	0.694452	0.551743	0.0505397	98.9176	14.4617	30.5681	1.2105	360.844	11.1862	122.898	0.565331	555.146	19.097	102.491	0.0409964	841.749	16.4983	162.038	0.972231	10849.7	195.294	6.93197	0.300847		TC-DPI-060813-4 z3_CBK	41.7796	162.828	74.1789	65.8595	142.189
IE3330008	TC-DPI-060813-4 z4_BS	27.1076	0.0200804		4470.72	270.926	481965	3277.36	5.28888	0.172418	0.367627	0.0194107	61.1759	3.0955	1.40046	0.113997	18.6656	1.6799	32.1788	0.0836648	1.05173	0.201511	130.181	1.92668	34.2276	0.821462	333.876	4.00651	108.076	1.34015	444.696	3.46863	82.0389	0.59068	678.839	22.4017	130.979	2.64578	9147.21	305.517	1.62295	0.0094131		TC-DPI-060813-4 z4_BS	1.55117	99.7976	15.0587	40.8437	217.424
IE3330008	TC-DPI-060813-4 z4_CBK	27.1867	0.0635837		3762.17	78.2532	479882	10077.5	32.8484	0.564993	0.600999	0.126931	70.4622	0.140924	0.212201	0.27357	3.53051	2.33367	11.2395	0.0561977	0.293379	0.290269	61.9613	11.5744	20.8612	0.133512	249.947	8.64817	88.5633	4.00306	404.977	23.5696	79.2308	5.15	639.853	20.0914	124.085	7.96625	12213.1	329.753	5.75649	0.101314		TC-DPI-060813-4 z4_CBK	2.53586	114.946	2.28173	7.72541	75.9428
IE3330008	TC-DPI-060813-4 z5_BS	30.7969	0.0318477		2035.11	40.7023	482698	15832.5	3.91085	0.28862	8.12341	0.0194962	106.145	0.0849161	2.29463	0.158789	13.0003	1.79664	7.89403	0.258924	2.43843	0.0546209	33.8117	3.13772	9.57465	0.289154	102.697	0.30809	40.3109	0.685286	207.096	2.1538	47.0598	0.828253	460.199	24.5746	110.843	2.6824	11757.8	21.164	1.05071	0.0796442		TC-DPI-060813-4 z5_BS	34.276	173.157	24.6735	28.447	53.3381
IE3330008	TC-DPI-060813-4 z5_CBK				2279.22	13.2195	485565	7283.48	6.17942	0.0704454	6.91095	0.029026	51.0549	1.06194	2.50701	0.230144	17.9798	0.783918	23.088	1.2606	1.18685	0.188471	85.7963	2.72832	21.2673	1.42916	208.272	5.99824	64.7592	3.85965	267.562	15.8397	48.1028	2.33779	381.96	14.2853	74.5287	2.47435	8540.34	54.6582	0.755582	0.00151116		TC-DPI-060813-4 z5_CBK	29.1601	83.287	26.9571	39.343	156
IE3330008	TC-DPI-060813-4 z6_CBK	27.1096	0.0996677		3556.38	55.4795	483360	5510.3	20.7312	0.0829249	0.518977	0.093831	60.956	2.4992	0.67778	0.0405313	14.2547	0.219522	24.6293	3.70917	0.685966	0.200576	98.3862	2.61707	27.3977	0.0164386	271.814	18.7552	86.0633	1.66963	363.456	1.52651	68.7128	1.11315	551.273	4.8512	108.722	2.28315	9031.59	46.9643	1.6879	0.0405096		TC-DPI-060813-4 z6_CBK	2.18977	99.4388	7.28796	31.1918	166.414
IE3330008	TC-DPI-060813-4 z7_CBK				1662.55	26.6008	486479	7686.37	5.46484	0.0415328	0.170988	0.0142262	33.718	1.24756	0.410768	0.00246461	6.69993	0.774512	11.5246	0.486336	1.13528	0.0145316	47.4323	0.683026	12.395	0.369371	123.207	1.84811	40.0763	1.93168	172.509	5.38227	32.562	0.827075	273.518	2.29755	55.9304	0.894887	8687.83	145.956	0.599252	0.0559701		TC-DPI-060813-4 z7_CBK	0.721466	55.0048	4.41686	14.6607	77.8687
IE3330008	TC-DPI-060813-4 z8_CBK				1636.05	105.362	487568	20380.3	16.1088	0.164309	1.75192	0.0651714	33.466	6.89399	0.371667	0.216087	7.9432	1.35511	13.9566	1.59384	1.50414	0.233443	47.6386	3.32517	12.346	0.34075	119.105	4.09722	38.2389	0.864198	165.065	5.94233	30.4497	0.420206	262.407	8.23957	54.1904	3.22975	7637.74	152.755	0.411375	0.0524915		TC-DPI-060813-4 z8_CBK	7.39207	54.5937	3.99642	17.3812	94.3013
IE3330008	TC-DPI-060813-4 z9_CBK	27.064	0.0447646		5801.85	128.801	480878	21351	11.1127	0.0711211	0.56447	0.0725908	144.996	1.73996	2.51112	0.107978	31.4927	0.352719	47.9373	0.153399	1.10645	0.329281	186.176	8.34066	47.2817	0.756508	447.378	10.4686	139.255	4.45616	557.409	17.9486	100.963	0.363466	811.261	9.24838	153.737	3.44372	8282.53	180.559	2.56516	0.00102606		TC-DPI-060813-4 z8_CBK	2.38173	236.536	27.0013	68.9119	323.901
IE3330004	TC-RCI-050711-1 z1b_CBK	27.1628	0.0908986		3554.03	189.074	485854	4955.71	14.6058	0.134373	10.9467	0.0919526	132.987	2.18099	5.67762	0.0227105	33.2894	0.732366	24.9039	2.49538	0.534334	0.0244725	84.3389	3.84585	24.2683	0.174732	237.939	3.23597	82.0873	0.705951	356.73	7.20594	68.2889	1.76185	541.656	4.11659	101.375	1.0543	10078.4	264.055	3.86166	0.146743		TC-RCI-050711-1 z1b	46.1888	216.945	61.0496	72.8433	168.27
IE3330004	TC-RCI-050711-1 z3_CBK	27.2902	0.0867257		6259.6	245.376	484672	35671.9	38.9463	0.825661	3.28184	0.0387257	116.028	5.29089	1.57507	0.267762	13.4234	1.28865	22.1296	2.80161	0.53121	0.0334662	108.444	2.84123	35.8289	1.54781	381.984	6.41734	139.401	0.836404	622.073	6.8428	119.62	2.36847	950.108	0.190022	171.75	0.10305	10464.1	48.1348	9.61128	0.361384		TC-RCI-050711-1 z3	13.8474	189.28	16.9362	29.373	149.525
IE3330004	TC-RCI-050711-1 z4_CBK	27.125	0.0563106		5030.81	67.4129	484885	20365.2	34.0044	0.55087	6.58725	0.12384	119.19	1.5733	2.73081	0.174226	19.6397	0.856291	21.496	1.92604	0.513553	0.0788817	93.5311	4.30243	29.7329	0.541138	310.059	1.17822	113.695	2.86511	513.335	4.82535	97.9665	3.91866	774.695	7.90189	146.697	3.63807	10581.9	76.1894	8.46185	0.248778		TC-RCI-050711-1 z4	27.7943	194.437	29.3636	42.9753	145.243
IE3330004	TC-RCI-050711-1 z5_CBK	27.1718	0.0645804		4475.51	241.678	485590	3884.72	14.5894	0.306378	6.58549	0.067172	96.4755	1.87163	2.12281	0.0280212	15.1623	0.718692	21.9261	2.65744	0.687434	0.20623	93.5281	4.19006	28.4785	0.262002	288.269	8.12918	101.513	1.78664	452.397	2.6239	87.4275	0.367196	698.011	0.698011	131.458	0.0788748	10041	132.541	3.9471	0.0378921		TC-RCI-050711-1 z5	27.7869	157.383	22.826	33.1778	148.149
IE3330004	TC-RCI-050711-1 z6_CBK	27.0136	0.0787142		4485.08	85.2165	485521	5534.94	11.3075	0.289472	7.09018	0.0836641	87.5223	1.03276	2.86417	0.533308	19.4492	0	20.3194	2.97069	0.621394	0.0507058	89.4232	2.18193	27.4316	0.175563	284.489	7.45361	99.0793	0.317054	435.781	9.7615	83.8166	1.30754	676.223	12.0368	122.852	2.13763	10160	164.592	3.30897	0.0172067		TC-RCI-050711-1 z6	29.9164	142.777	30.7975	42.5584	137.293
IE3330004	TC-RCI-050711-1 z7a_CBK	27.1367	0.0459816		1863.65	664.204	486236	10599.9	8.70152	0.0922361	1.38688	0.389159	12.6877	3.12371	0.777352	0.129351	4.91671	1.04529	5.87652	1.9416	0.165026	0.0869356	32.2859	7.60009	13.298	2.85908	154.247	34.1503	52.0501	9.82706	237.785	50.03	48.5094	10.5556	424.837	77.6602	71.364	13.7875	9981.61	225.584	1.38249	0.00138249		TC-RCI-050711-1 z7a	5.85183	20.6977	8.35862	10.7587	39.7062
IE3330004	TC-RCI-050711-1 z8_CBK	27.2087	0.0761082		4854.74	18.448	484284	6392.55	26.1069	0.0992064	0.455969	0.00975773	71.188	1.85089	0.442744	0.0813763	6.42669	0.00257067	14.7899	0.538354	0.401344	0.201475	79.963	0.703674	28.3971	0.851914	300.339	6.36719	110.709	2.59059	503.407	3.32249	94.5724	1.26727	774.555	2.32367	143.051	3.43323	11200.3	230.725	6.74236	0.142938		TC-RCI-050711-1 z8	1.92392	116.131	4.76069	14.0628	99.9321
IE3330002	TC-RCI-061113-1A z1_BS	34.0021	0.0244928		4532.83	31.7298	481642	674.298	3.53181	0.0593345	0.971279	0.00718746	106.82	4.08053	0.922242	0.0702749	10.184	0.617148	19.6982	0.354568	5.85511	0.00299916	93.1604	2.73892	26.78	1.03906	285.766	11.3163	99.3343	5.38392	444.388	17.5089	86.3376	0.725236	748.735	39.2337	150.832	7.96395	9388.31	219.687	0.945336	0.0011344		TC-RCI-061113-1A z1_BS	4.09822	174.258	9.91658	22.2844	133.096
IE3330002	TC-RCI-061113-1A z1_CBK	33.3545	0.0225024		4167.66	26.673	480843	3558.24	6.38124	0.187608	4.29162	0.0034333	117.41	1.1741	1.67874	0.0285385	10.4508	0.453565	12.0838	0.732278	2.67171	0.263431	62.1928	0.0746313	19.3088	0.166055	222.203	6.93272	84.1242	1.17774	402.424	2.73648	83.2256	1.34825	742.734	0.742734	152.181	1.61312	10711.5	83.5497	2.00597	0.0389158		TC-RCI-061113-1A z1_CBK	18.1081	191.534	18.0509	22.8683	81.6473
IE3330002	TC-RCI-061113-1A z2_BS	27.1119	0.0179709		6163.48	23.4212	479153	3641.56	4.15965	0.0931761	1.44611	0.0205348	123.171	0.221708	1.31948	0.134851	13.9389	0.440471	24.6901	1.39746	6.43694	0.0424838	117.211	5.46205	33.6999	0.647038	361.468	20.676	127.916	3.76072	579.266	10.3109	110.876	4.05808	935.501	24.6972	184.053	0.257674	9704.75	32.9962	1.12143	0.0127842		TC-RCI-061113-1A z2_BS	6.10173	200.931	14.188	30.501	166.825
IE3330002	TC-RCI-061113-1A z2_CBK	33.3017	0.0327922		5948.82	236.763	477935	20646.8	19.3397	0.313304	2.54092	0.0889323	69.7145	0.250972	1.59406	0.0315624	10.6493	0.374857	17.6128	0.982793	0.386783	0.0877225	93.6197	1.59153	30.6674	1.2267	348.918	4.04745	124.876	2.27274	560.979	5.72198	106.766	2.94673	873.518	5.24111	164.698	1.15289	11336.4	174.581	5.16147	0.129037		TC-RCI-061113-1A z2_CBK	10.7212	113.727	17.1405	23.3027	119.005
IE3330002	TC-RCI-061113-1A z3_BS	27.0977	0.0212332		5753.55	143.839	474811	18992.5	22.7597	1.12433	948.333	7.966	1738.01	27.8082	210.962	0.0843848	678.347	0.542678	121.868	4.24102	0.856262	0.054287	179.336	3.55085	38.9039	0.49797	380.615	1.82695	131.902	0.923311	582.05	4.77281	108.965	0.588413	892.3	14.6337	168.76	2.19388	10877.1	17.4034	5.48721	0.119621		TC-RCI-061113-1A z3_BS	4001.41	2835.26	2268.41	1484.35	823.435
IE3330002	TC-RCI-061113-1A z3_CBK	85.1737	0.161252		6973.38	128.31	476201	14381.3	17.3923	0.27132	5.15703	0.0247537	81.7387	0.490432	2.95321	0.0206725	17.8717	1.3368	24.8548	1.61556	0.485451	0.0342728	122.718	2.84706	39.0283	0.811789	429.252	2.83306	148.74	3.48052	654.017	13.0803	122.645	0.024529	987.386	11.2562	186.106	6.40204	11630.8	286.118	5.00272	0.114062		TC-RCI-061113-1A z3_CBK	21.7596	133.342	31.755	39.1065	167.938
IE3330002	TC-RCI-061113-1A z4_BS	27.1403	0.015127		5530.39	221.216	478303	13775.1	23.2608	1.22352	9.46482	0.645501	96.9535	4.5956	4.27314	0.123921	22.8691	1.10229	19.9443	1.65937	0.333056	0.0805329	91.0122	0.473263	29.4543	0.871848	330.334	16.3185	118.956	2.66462	538.745	29.9542	101.863	2.52621	829.527	26.2131	158.581	5.16973	11437.5	299.662	5.9563	0.296624		TC-RCI-061113-1A z4_BS	39.936	158.162	45.9477	50.0419	134.759
IE3330002	TC-RCI-061113-1A z4_CBK	27.1284	0.0119421		6157.27	336.187	477863	19783.5	24.6163	0.92065	27.7331	0.92074	130.388	2.2166	9.81745	0.386808	43.1544	2.30445	25.8793	0.595223	0.374417	0.220906	100.476	2.33105	31.4771	0.579179	352.783	7.19677	125.307	1.97984	565.51	11.3102	108.12	1.47044	877.358	0.350943	165.995	0.365188	11036.8	103.746	6.27663	0.109213		TC-RCI-061113-1A z4_CBK	117.017	212.705	105.564	94.4298	174.86
IE3330002	TC-RCI-061113-1A z5_BS	34.2171	0.0212615		5165.94	121.916	475320	3612.43	25.3689	0.126845	922.686	6.82787	1516.38	32.4506	201.769	0.403539	644.09	10.6919	113.239	0.588843	0.786799	0.15437	160.43	2.34227	35.797	0.171826	357.698	7.2255	124.441	0.398211	556.313	16.8006	105.476	2.48923	867.085	25.6657	162.232	11.0967	11366.3	425.099	6.43176	0.0385906		TC-RCI-061113-1A z5_BS	3893.19	2473.7	2169.56	1409.39	765.128
IE3330002	TC-RCI-061113-1A z5_CBK	27.1939	0.0113492		4538.7	152.5	478558	16366.7	12.5256	0.338191	0.749825	0.0419902	109.214	4.30304	0.480579	0.0267202	3.325	0.07049	6.98858	0.131385	0.901118	0.191578	45.1154	3.58217	15.9607	0.788459	200.77	10.5605	81.9923	4.01762	429.042	16.3894	90.8763	1.29044	846.311	26.9127	179.439	4.62953	12525.6	305.624	3.40948	0.0409138		TC-RCI-061113-1A z5_CBK	3.16382	178.163	5.16751	7.27571	47.2202
IE3330002	TC-RCI-061113-1A z6_CBK	33.3134	0.0295345		4359.7	142.126	477304	1527.37	13.9881	0.0643454	11.5002	0.0253005	160.191	1.5058	2.3984	0.0273417	8.30429	0.358745	6.45695	0.00903973	1.24861	0.00998886	42.1039	3.39357	14.5462	0.0640031	190.92	3.322	82.6766	2.31495	453.344	1.54137	103.693	2.21902	1025.21	29.116	226.68	2.08546	13639.5	305.524	4.24922	0.0263452		TC-RCI-061113-1A z6_CBK	48.5241	261.324	25.7892	18.1713	43.628
IE3330002	TC-RCI-061113-1A z7_CBK	33.3312	0.0792212		5438.13	68.5204	474910	20231.2	17.7232	1.13428	0.716145	0.15039	176.978	3.64575	3.28186	1.05545	12.5692	5.97036	7.78737	0.556018	2.59391	0.959228	48.7373	9.88392	17.0916	0.0581115	237.315	7.40421	99.2791	3.31592	572.572	1.37417	137.714	9.94295	1322.18	31.2034	303.386	10.4365	14338.1	20.0733	6.17463	0.838515		TC-RCI-061113-1A z7_CBK	3.02171	288.708	35.2888	27.5037	52.6173
IE3330002	TC-RCI-061113-1A z8_CBK	27.1511	0.0211742		5688.17	218.426	477930	15676.1	24.2383	0.058172	12.0242	0.185172	96.8622	4.06821	5.61338	0.277301	29.3468	1.19148	22.5091	1.67017	0.473059	0.0716211	97.1665	7.01542	31.2345	1.11195	348.234	9.61127	124.756	4.16686	558.101	17.636	106.353	4.57317	866.316	11.0888	164.097	4.16806	11540.1	348.51	6.51334	0.0768574		TC-RCI-061113-1A z8_CBK	50.735	158.013	60.359	64.2162	152.088
IE3330002	TC-RCI-061113-1A z9_CBK	33.9643	0.0310869		4317.36	178.739	481195	12414.8	4.64417	0.0287939	0.65705	0.0253621	82.8271	3.03147	0.621936	0.148518	7.20328	0.32847	14.6803	0.126251	3.50595	0.177401	73.8554	3.8848	22.7889	0.401084	253.975	11.6829	93.258	3.84223	433.321	16.6395	86.1657	2.51604	756.708	11.6533	152.673	1.52673	10146.5	261.779	1.44681	0.0141787		TC-RCI-061113-1A z9_CBK	2.77236	135.118	6.68748	15.7621	99.1915
IE3330003	TC-RCM 050411-1 z5_CBK	27.1183	0.0298038		7204.02	705.994	483689	11802	21.3503	0.286094	56.9877	6.86132	156.176	17.6791	18.9182	2.41017	80.0353	12.5976	37.7316	3.84108	0.622433	0.199427	134.282	14.5831	40.0963	1.84443	421.013	18.0194	150.684	6.17805	679.623	35.2045	126.187	3.2304	995.367	4.77776	186.483	7.04907	11323.5	67.9409	5.8534	0.238819		TC-RCM 050411-2 z5	240.455	254.773	203.421	175.132	254.944
IE3330003	TC-RCM 050411-1 z8_CBK	27.146	0.050457		6840.53	194.271	483825	14127.7	30.5666	0.268986	303.964	2.06695	484.127	7.64921	70.3473	1.46322	250.268	2.20236	67.8659	4.84563	0.869123	0.0125154	151.708	3.61065	43.5132	0.487348	439.214	9.83839	154.201	1.29529	686.296	12.0788	130.349	2.81553	1018.43	2.03686	190.363	1.14218	11150.1	26.7602	6.39834	0.0563054		TC-RCM 050411-3 z8	1282.55	789.767	756.422	547.632	458.554
IE3330003	TC-RCM 050411-1 z9_CBK	27.1998	0.0464318		13178.5	693.19	482043	674.861	31.038	0.738703	1023.75	78.4192	1965.62	128.945	262.564	14.5986	1035.6	77.0489	241.765	22.9193	1.63981	0.241052	361.765	23.0083	87.6215	2.68122	820.324	35.9302	287.284	7.75666	1237.17	34.3933	228.783	1.14391	1741.99	20.9038	330.125	15.3178	11418.5	95.9152	8.70066	0.0348026		TC-RCM 050411-4 z9	4319.62	3206.56	2823.27	2266.09	1633.55
IE3330003	TC-RCM 050411-1 z10_CBK	27.1048	0.0312069		7089.91	236.803	483992	1451.98	23.4852	0.145608	303.676	23.9904	641.354	41.8163	88.4151	5.26954	334.91	18.8219	82.0546	3.64322	0.475625	0.000856126	150.133	9.48838	41.161	0.905542	409.526	1.80191	146.168	8.03922	655.099	0.13102	120.235	3.15016	967.838	1.54854	174.972	0.489922	11089.4	159.687	6.38575	0.321842		TC-RCM 050411-5 z10	1281.33	1046.25	950.701	732.844	554.423
IE3330003	TC-RCM 050411-1 z15_CBK	27.0817	0.0198833		5978.31	429.243	484209	1743.15	27.1008	0.135504	67.8235	2.56373	206.079	6.18237	17.6507	0.148266	68.8733	4.11862	27.909	0.881923	0.326242	0.0247944	99.7647	1.51642	32.5505	0.110672	354.457	12.1224	129.864	1.45448	593.495	16.9739	112.936	0.0225872	901.567	7.21254	162.114	4.99311	11021.4	193.976	6.62559	0.27695		TC-RCM 050411-8 z15	286.175	336.181	189.792	150.707	188.574
IE3330003	TC-RCM 050411-1 z16_CBK	27.1116	0.0261853		5623.79	245.197	484850	17551.6	27.0821	0.758298	33.9136	0.773229	161.288	5.54832	13.5483	0.222192	63.1316	1.99496	30.0916	2.98509	0.408597	0.027376	99.159	0.456131	31.3564	0.0940693	338.018	2.63654	122.222	4.44888	541.596	13.215	104.232	0.333543	846.438	14.0509	149.797	2.06719	10507.9	12.6094	7.02806	0.0913648		TC-RCM 050411-7 z16	143.095	263.113	145.68	138.144	203.322
IE3330003	TC-RCM 050411-1 z17_CBK	27.082	0.0205158		5218.37	54.271	483962	16261.1	23.1344	0.925377	0.680522	0.00680522	68.1301	3.99242	0.56943	0.0324575	6.93428	1.24678	15.2382	0.219431	0.364542	0.00627012	83.6005	0.183921	29.3403	0.698299	326.004	9.51932	118.952	4.97221	542.622	6.40294	102.881	0.308644	834.636	10.8503	153.81	2.09182	11403.6	118.597	6.48924	0.0519139		TC-RCM 050411-1 z17	2.8714	111.142	6.12291	15.1735	102.961
IE3330003	TC-RCM 050411-1 z18_CBK	27.1489	0.0268133		5257.49	190.321	484789	1163.49	19.6496	0.0353693	1.00025	0.0220055	67.3482	2.24943	0.614228	0.163385	7.49619	0.23688	16.6807	1.87157	0.355934	0.0429257	86.303	0.724945	28.4339	0.130796	315.321	12.6759	113.508	0.272419	509.351	7.02904	100.779	0.866697	814.125	8.62973	140.937	0.0845621	10645.4	151.164	5.12102	0.281656		TC-RCM 050411-6 z18	4.22046	109.867	6.6046	16.403	112.707
IE3330001	TC-RCM-060913-8b z3_CBK	27.0922	0.0197939		7276	1504.68	484577	22775.1	22.7852	0.214181	20.6587	7.77181	119.55	40.8383	11.7846	4.24716	59.8082	21.4233	36.3862	9.8461	0.359475	0.0578755	122.629	27.1992	37.8807	5.16692	399.442	40.6632	142.862	18.3435	639.026	63.5192	121.826	13.7664	1001.9	92.3748	171.424	16.0796	10488.8	14.6843	6.21769	0.292232		TC-RCM-060913-8b z3	87.1676	195.025	126.716	130.871	245.853
IE3330001	TC-RCM-060913-8b z4_CBK	27.1355	0.0160526		6435.61	2123.75	484321	23247.4	23.0391	0	0.05479	0.00895268	27.8582	7.85045	0.174381	0.00533607	3.42628	0.936061	14.5002	3.36115	0.197681	0.022417	96.1142	19.5112	35.724	7.0662	407.866	62.1587	148.623	23.0366	666.98	106.583	128.112	19.6523	1065.76	141.106	178.57	30.5354	10640	114.911	5.97648	0.276113		TC-RCM-060913-8b z4	0.231181	45.4458	1.87507	7.49734	97.9745
IE3330001	TC-RCM-060913-8b z6_CBK	27.1055	0.0233385		6653.64	1397.26	483975	18681.5	20.2598	0.295793	0.792933	0.257069	38.3337	10.9481	0.671838	0.166884	6.42898	1.81169	18.0644	2.62295	0.342076	0.142372	104.245	18.8266	35.9775	3.47543	395.548	27.0555	142.366	15.4894	641.32	63.7472	122.763	8.37243	996.321	79.5064	178.788	6.00726	11085.4	126.373	5.26387	0.0905386		TC-RCM-060913-8b z6	3.34571	62.5347	7.22406	14.0678	122.057
IE3330001	TC-RCM-060913-8b z11_CBK	27.1362	0.013374		5497.18	2219.76	484684	33637.1	26.5393	1.46497	0.844247	0.337192	36.6731	13.7157	0.665042	0.256041	5.88483	2.31509	14.6455	5.55356	0.192903	0.0738817	85.8007	29.6527	31.8051	9.39522	371.843	104.934	132.751	43.2768	598.519	168.543	116.48	34.5947	999.363	278.023	161.482	41.2425	10440.2	325.733	7.14871	0.304535		TC-RCM-060913-8b z11	3.56223	59.8256	7.15099	12.8771	98.9558
IE3330001	TC-RCM-060913-8b z12_CBK	27.1465	0.0285132		6060.86	267.89	484155	4357.4	25.1512	0.357148	1.00812	0.140936	88.5496	4.8171	0.79094	0.305777	9.43293	1.34702	19.8481	0.782013	0.613735	0.0510627	98.7011	4.48103	32.7667	0.806062	349.709	7.90342	128.9	2.11397	585.98	0.703177	112.387	1.86562	869.315	18.4295	164.709	4.31537	11112.4	348.929	6.69273	0.172673		TC-RCM-060913-8b z12	4.25369	144.453	8.50473	20.641	134.108
IE3330001	TC-RCM-060913-8b z13_CBK	27.1048	0.0175035		6127.24	480.375	483992	9099.05	20.6919	0.165535	0.24182	0.0112688	43.3471	5.07161	0.415872	0.039591	6.05534	0.551036	18.3383	1.98787	0.278599	0.0197806	100.69	9.08225	33.431	1.39073	362.952	11.5419	132.077	2.61513	597.668	12.0729	114.355	0.686129	923.573	23.4587	161.732	5.95172	11210.4	44.8417	5.92994	0.117413		TC-RCM-060913-8b z13	1.02034	70.713	4.47174	13.2502	123.908
IE3330001	TC-RCM-060913-8b z14_CBK	27.1137	0.0339825		6410.25	1387.18	484354	14627.5	22.0021	0.272827	0.939799	0.330433	42.2037	12.7118	0.637009	0.244102	6.94659	1.78527	18.329	5.3924	0.280509	0.0476305	101.492	18.6745	34.083	4.58758	378.05	48.8441	134.674	12.0938	607.782	46.9208	115.727	6.98991	946.406	56.4058	163.562	11.8419	10812.9	376.289	6.18222	0.0284382		TC-RCM-060913-8b z14	3.9654	68.8478	6.84956	15.2004	123.845
IE3330001	TC-RCM-060913-8b z15_CBK	27.1154	0.0375691		5129.64	168.252	484711	3780.75	23.9884	0.100751	0.692668	0.0178708	58.5029	3.32296	0.538568	0.0727067	6.92042	0.0692042	16.2904	0.449615	0.270653	0.0296094	84.5595	0.744123	28.3732	0.385875	318.697	1.01983	115.641	2.26656	515.288	8.55377	100.225	0.641439	813.405	13.3398	140.104	6.58487	10720	310.88	6.53908	0.234099		TC-RCM-060913-8b z15	2.92265	95.437	5.79105	15.1432	110.07
																																												Chondrite-->	0.237	0.613	0.093	0.457	0.148
[truncated: 9 more columns]
